# Supplementary material
Source: publisher site journal article supplement (https://www.oncotarget.com/article/28621)
Supplement: Supplementary file 1 [file 28621]

**Addendum****Addendum: C/EBP $\beta$  cooperates with MYB to maintain the oncogenic program of AML cells****Karl-Heinz Klempnauer<sup>1</sup>**<sup>1</sup>Institute for Biochemistry, Westfälische-Wilhelms-Universität, Muenster D-48149, Germany**Published:****Copyright:** © 2024 Klempnauer. This is an open access article distributed under the terms of the [Creative Commons Attribution License](#) (CC BY 4.0), which permits unrestricted use, distribution, and reproduction in any medium, provided the original author and source are credited.**This article has an addendum:** This article received a publication fee waiver.Original article: Oncotarget. 2023; 14:174–177. <https://doi.org/10.18632/oncotarget.28377>
